# Supplementary material
Source: PubMed Central journal article supplement (PMC5074637)
Supplement: supp_pp.16.00879_PP2016-00879R2_Supplemental_Figure_1.pdf [file supp_pp.16.00879_PP2016-00879R2_Supplemental_Figure_1.pdf]

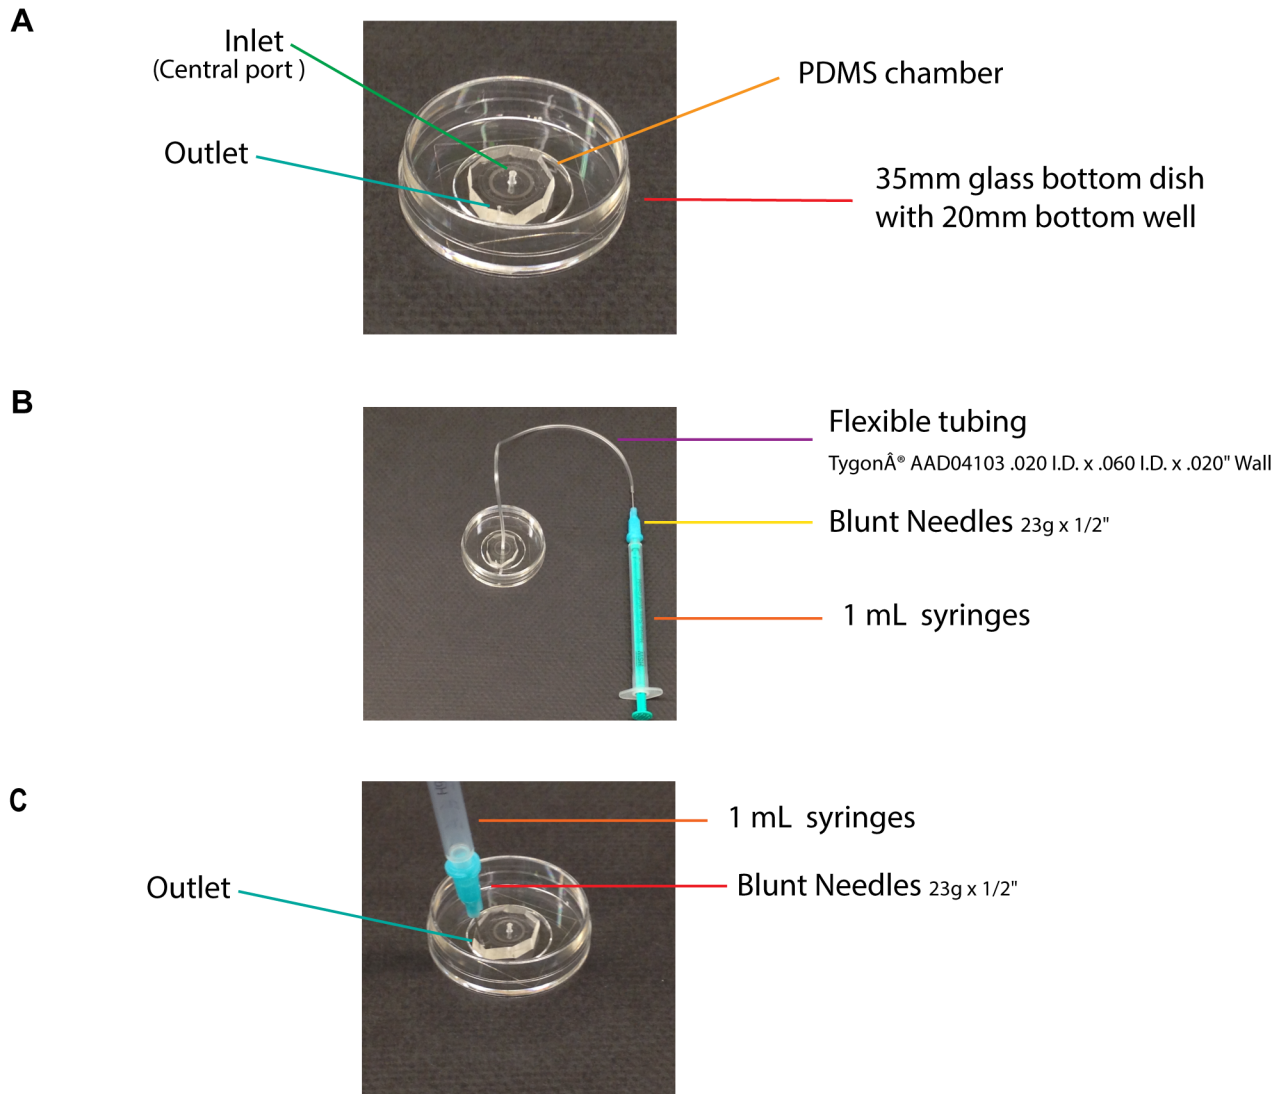

**Supplemental Figure 1. PDMS devices used in the study.**

(A) The PDMS chamber is attached to a 35 mm glass bottom dish with a 20 mm bottom well. (B) After moss tissue was loaded into the central hole (inlet), a flexible tubing was inserted into the hole and medium was pumped into the chamber using a blunt needle and a syringe. (C) LatB was injected into the chamber through the outlet hole using a blunt needle and a 1 mL syringe.
